# Supplementary material for: A sensitivity study of radiative fluxes at the top of atmosphere to cloud-microphysics and aerosol parameters in the community atmosphere model CAM5
Source: Copernicus journal article supplement (doi:10.5194/acp-13-10969-2013), 2013-11-08
Supplement: Supplementary file 1 [file acp-13-10969-2013-supplement.pdf]

1  
2  
3  
4

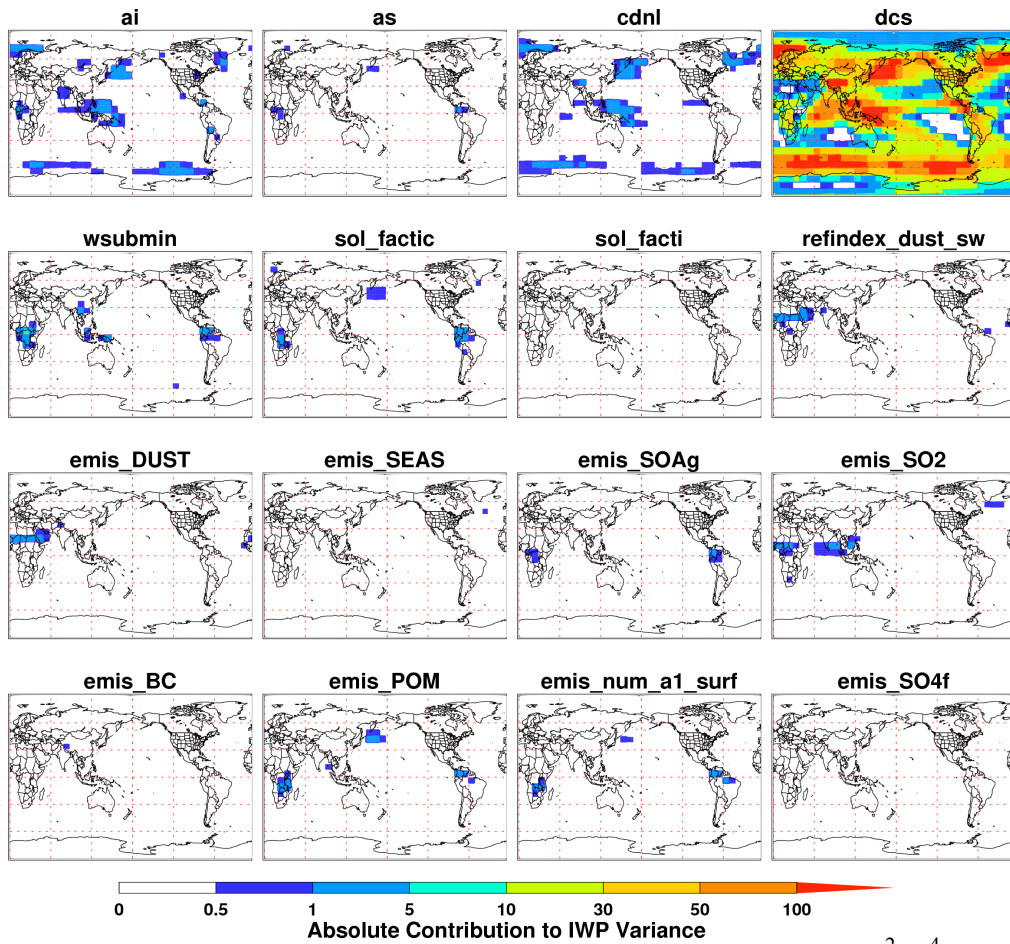

**Figure S1** Global spatial distribution of absolute IWP variance (unit in  $\text{g}^2/\text{m}^4$ ) in response to the perturbation of each of the 16 input parameters predicted by the GLM.

5  
6  
7  
8  
9  
10  
11  
12  
13  
14  
15  
16  
17  
18  
19  
20  
21  
22

1  
2  
3  
4

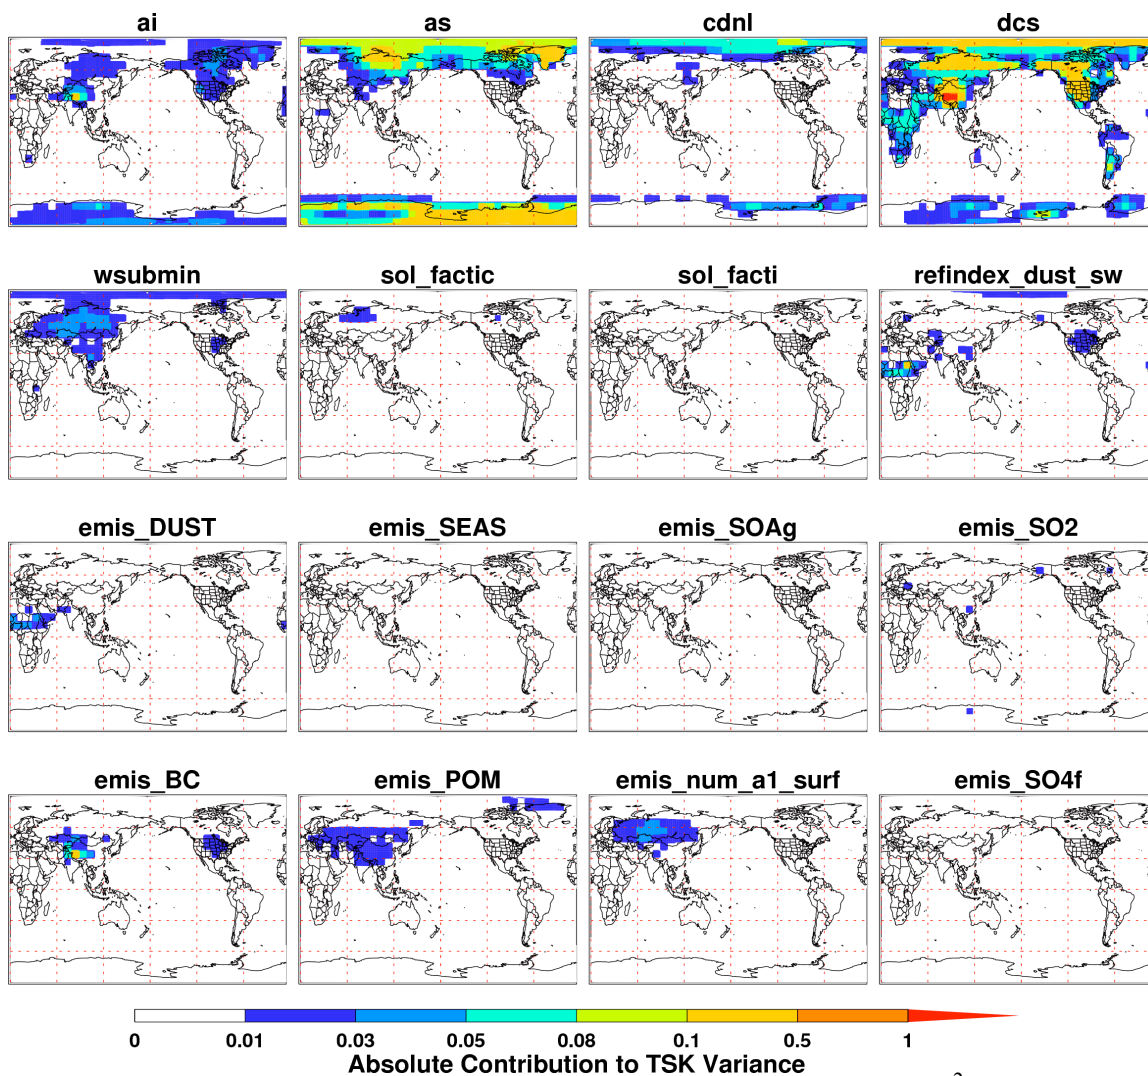

**Figure S2** Global spatial distribution of absolute TSK variance (unit in  $K^2$ ) in response to the perturbation of each of the 16 input parameters predicted by the GLM.

5  
6  
7  
8  
9  
10  
11  
12  
13  
14  
15  
16  
17  
18  
19

1  
2  
3  
4  
5

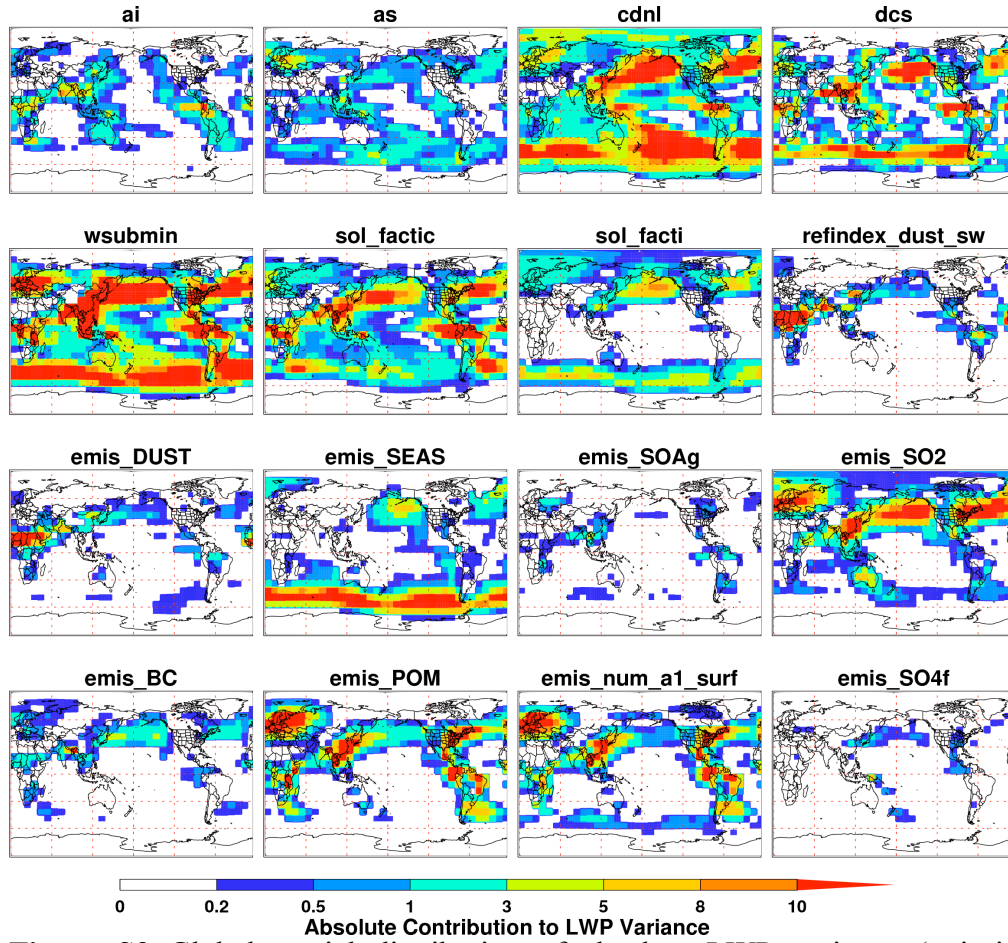

6  
7  
8  
9  
10  
11  
12  
13  
14  
15  
16  
17  
18  
19

**Figure S3** Global spatial distribution of absolute LWP variance (unit in  $\text{g}^2/\text{m}^4$ ) in response to the perturbation of each of the 16 input parameters predicted by the GLM.
